# Supplementary material for: Rubella Virus Strain-Associated Differences in the Induction of Oxidative Stress Are Independent of Their Interferon Activation
Source: PubMed Central journal article supplement (PMC6213305; doi:10.3390/v10100540), 2018-10-03
Supplement: viruses-10-00540-s001.pdf [file viruses-10-00540-s001.pdf]

*Supplementary information*

# Rubella Virus Strain-Associated Differences in the Induction of Oxidative Stress Are Independent of Their Interferon Activation

Sarah Zobel <sup>1,†</sup>, Mechthild Lorenz <sup>1,†</sup>, Giada Frascaroli <sup>2</sup>, Janik Böhnke <sup>1,‡</sup>, Nicole C. Bilz <sup>1</sup>, Megan L. Stanifer <sup>3</sup>, Steeve Boulant <sup>3,4</sup>, Sandra Bergs <sup>1</sup>, Uwe G. Liebert <sup>1</sup> and Claudia Claus <sup>1,\*</sup>

<sup>1</sup> Institute of Virology, University of Leipzig, 04103 Leipzig, Germany; zobel.sarah@icloud.com (S.Z.); Mechthild.Lorenz@medizin.uni-leipzig.de (M.L.); janik.boehnke@gmail.com (J.B.); Christin.Emmrich@medizin.uni-leipzig.de (N.C.B.); Sandra.Bergs@medizin.uni-leipzig.de (S.B.); liebert@medizin.uni-leipzig.de (U.G.L.)

<sup>2</sup> Leibniz Institute for Experimental Virology, Heinrich Pette Institute, 20251 Hamburg, Germany; giada.frascaroli@leibniz-hpi.de

<sup>3</sup> Schaller Research Group at CellNetworks, Department of Infectious Diseases, Virology, Heidelberg University Hospital, 69120 Heidelberg, Germany; m.stanifer@dkfz-heidelberg.de (M.L.S.); s.boulant@Dkfz-Heidelberg.de (S.B.)

<sup>4</sup> Research Group “Cellular Polarity and Viral Infection” (F140), German Cancer Research Center (DKFZ), 69120 Heidelberg, Germany

\* Correspondence: [claudia.claus@medizin.uni-leipzig.de](mailto:claudia.claus@medizin.uni-leipzig.de)

‡ Current address: Institute for Biomedical Engineering, Department of Cell Biology, RWTH Aachen University, Medical School, 52074 Aachen, Germany.

† These authors contributed equally to this work.

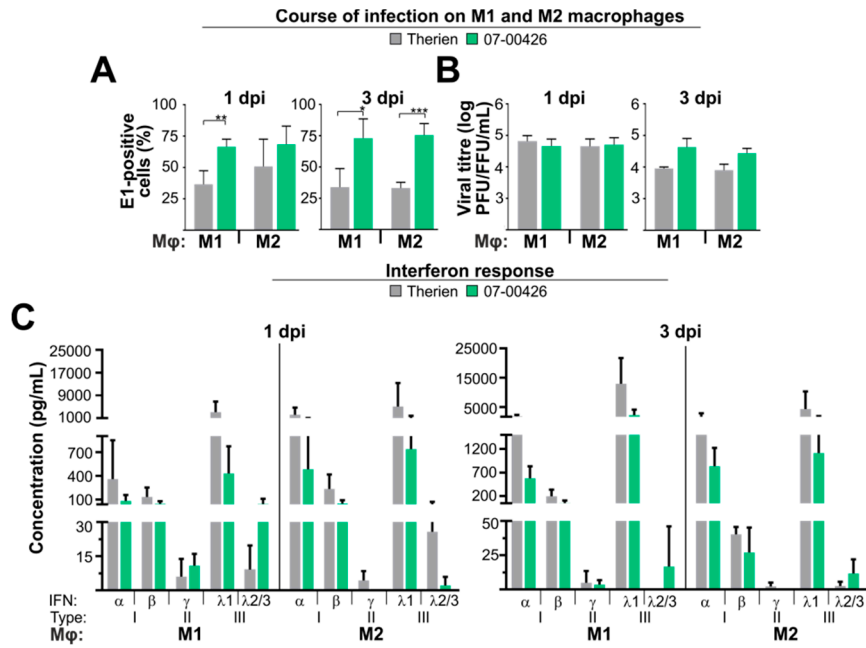

**Supplementary Figure S1.** Analysis of the time course of infection and immune activation of Therien and 07-00426 strains on M1- and M2-Mφ at 1 and 3 dpi. (A) The percentage of E1-positive cells was determined by immunofluorescence analysis with an antibody against viral E1 protein. Five independent microscopic fields were counted for three independent experiments. (B) Viral titre was determined by plaque and focus forming assay. (C) The type 1/2/3 IFN profile was determined by the LEGENDplex IFN panel.

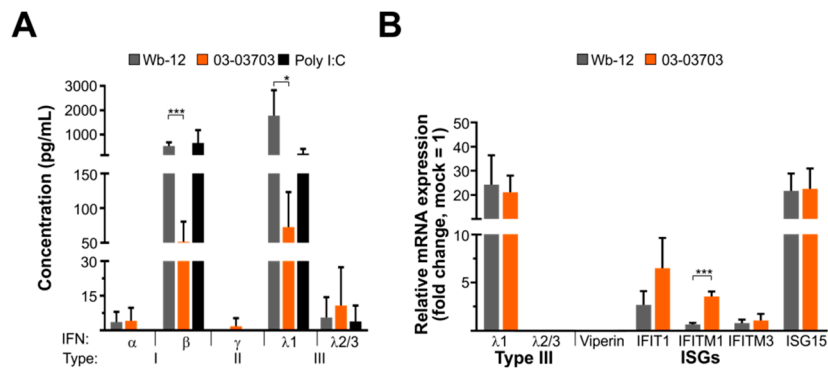

**Supplementary Figure S2.** Characterization of the IFN response on RV-infected HUVEC and Vero cells. (A) The type 1/2/3 IFN profile was determined at 36 hours post-infection (hpi) by the LEGENDplex IFN panel for HUVEC after infection with Wb-12 and 03-03703 strains. Supernatant collected at 4 hours post transfection from poly I:C-transfected HUVEC cells was used as a positive control. (B) The mRNA expression level of type III IFNs and indicated ISGs was determined at 3 dpi for Wb-12- and 03-03703-infected Vero cells by qRT-PCR.
